# Supplementary material for: Identification of a Clinically Relevant Signature for Early Progression in KRAS-Driven Lung Adenocarcinoma
Source: MDPI journal article supplement (doi:10.3390/cancers11050600), 2019-04-29
Supplement: s1 [file s1]

# Supplementary Materials: Identification of a Clinically Relevant Signature for Early Progression in KRAS-Driven Lung Adenocarcinoma

Sarah Neidler, Björn Kruspig, Kay Hewit, Tiziana Monteverde, Katarina Gyuraszova, Attila Braun<sup>4</sup>, William Clark, Daniel James, Ann Hedley, Bernhard Nieswandt, Emma Shanks, Craig Dick and Daniel J. Murphy

Figure S1

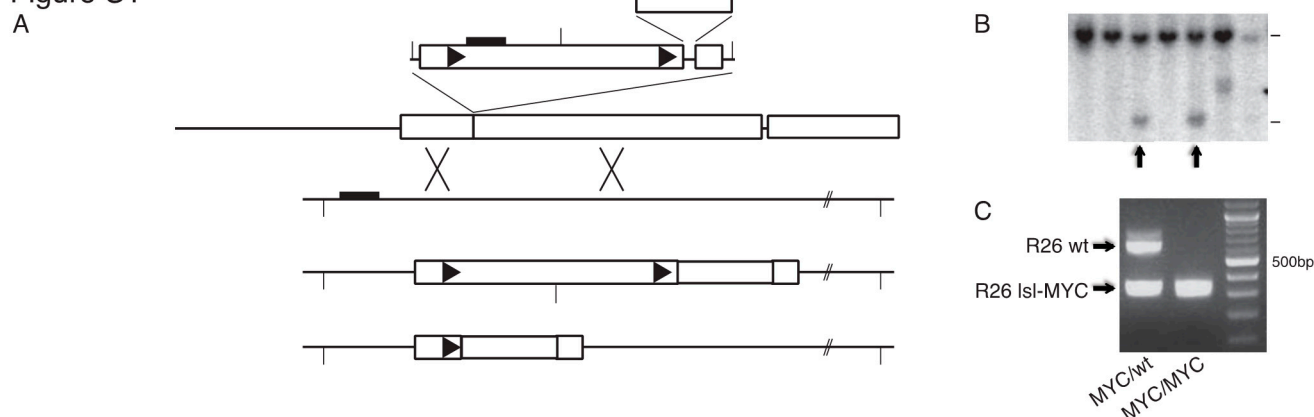

**Figure S1.** Generation and characterization of R26-lsl-MYC mice. (A) Schematic of Rosa26 targeting strategy adapted from Srinivas using vectors described by same [1]. (B) Southern blot of EcoRV-digested ES cell genomic DNA probed with external probe E. WT band = 11Kb; recombined band = 3.8Kb. Arrows indicate clones with the correctly targeted locus. (C) PCR of genomic DNA from heterozygous and homozygous R26-lsl-MYC mice.

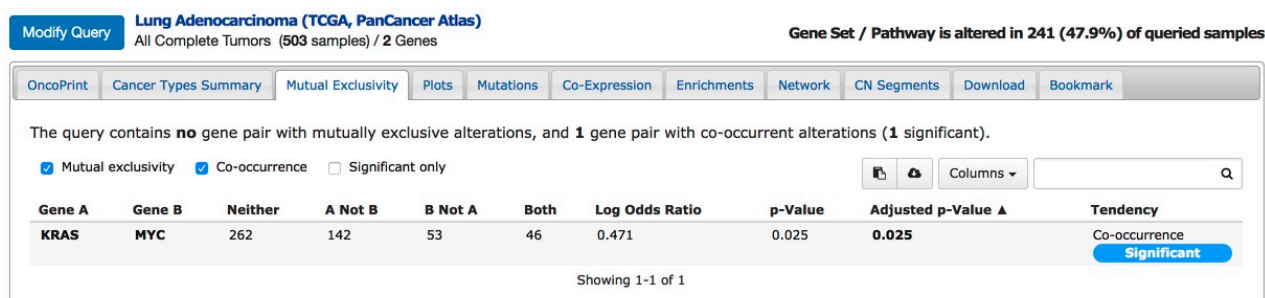

**Figure S2.** Significant co-occurrence of KRAS & cMYC alterations in human LuAd. Screenshot of cBioportal analysis of co-occurrent versus mutual exclusivity in alterations of KRAS and c-MYC in the TCGA PanCancer cohort of human LuAd.

Figure S3

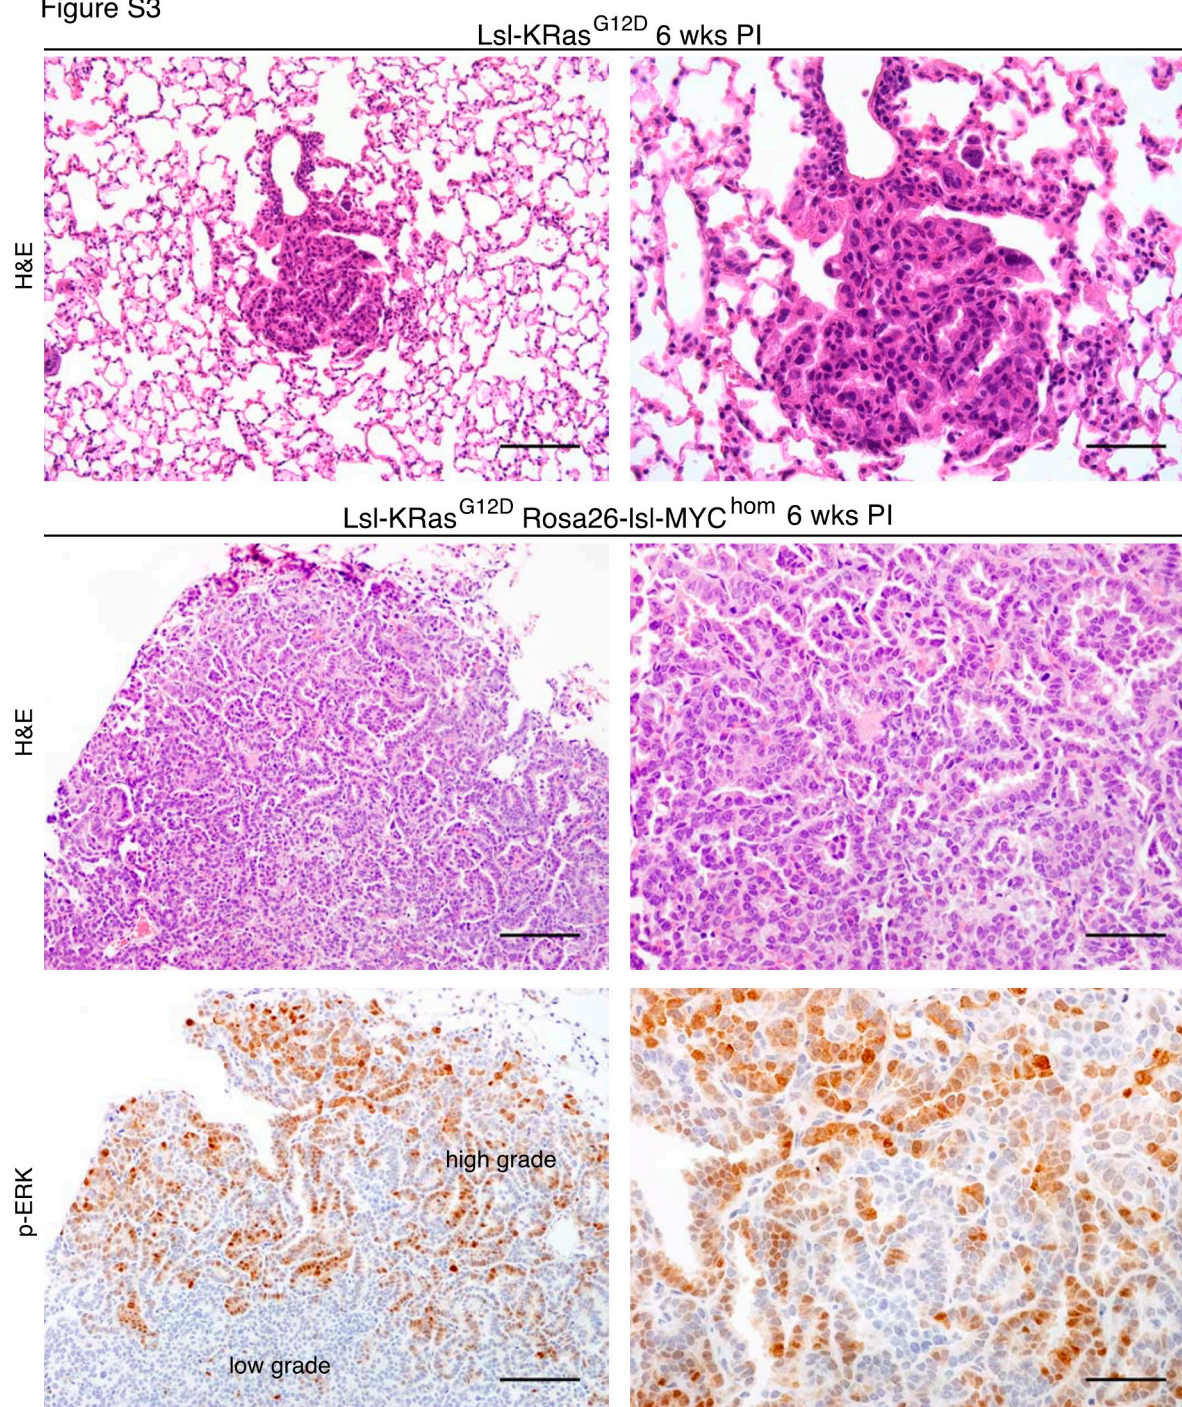

**Figure S3. Histology of K-only and KM<sup>2</sup> lung tumours at 6 weeks post induction.** Lung tumours were generated as per main Figure 1 and harvested at 6 weeks post induction. Top panels show atypical adenomatous hyperplasia in a K-only mouse. Middle and bottom panels show adenocarcinoma in a KM<sup>2</sup> mouse. Bottom panels show immunohistochemistry for phospho-ERK1/2, demarcating spontaneous progression from low grade to high grade adenocarcinoma. Scale bars = 50  $\mu$ M (left panels) & 100  $\mu$ M (right panels).

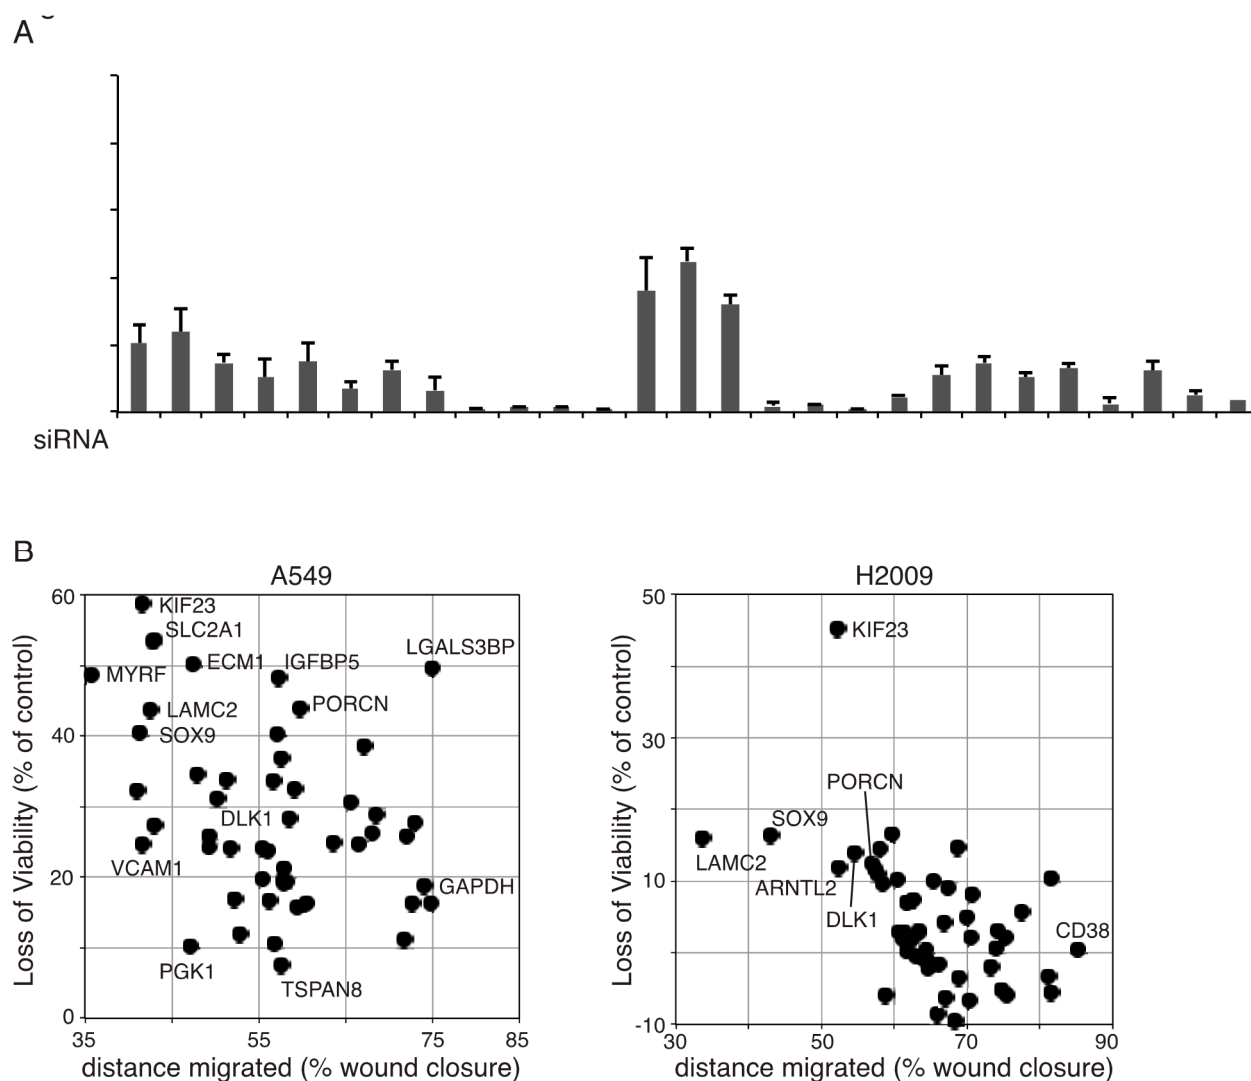

**Figure S4.** In vitro validation of KM tumour progression signature. **(A)** Confirmation of depletion of the indicated genes with individual siRNAs, performed by Q-PCR. Mean  $\pm$  SEM of biological triplicates shown. **(B)** Loss of viability ( $y$ -axis) upon depletion of most targeted genes does not alone account for suppression of cell migration ( $x$ -axis). Mean values for 4 siRNAs targeting each gene shown. .

## Reference

1. Mishra, R.; Hanker, A.B.; Garrett, J.T. Genomic alterations of ERBB receptors in cancer: Clinical implications. *Oncotarget* **2017**, *8*, 114371–114392. doi:10.18632/oncotarget.22825.

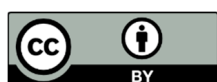

© 2019 by the authors. Submitted for possible open access publication under the terms and conditions of the Creative Commons Attribution (CC BY) license (<http://creativecommons.org/licenses/by/4.0/>).
